# Supplementary material for: Association between Smoking Status and Obesity in a Nationwide Survey of Japanese Adults
Source: PubMed Central journal article supplement (PMC4805304; doi:10.1371/journal.pone.0148926), 2016-03-23
Supplement: pone.0148926.s001.pdf [file pone.0148926.s001.pdf]

**Table S1. Comparison of prevalence of obesity and odds ratio for obesity in past smokers stratified by the duration of smoking cessation**

**Men**

| Duration of smoking cessation (year) | n    | BMI       | Cochran-Mantel-Haenszel trend test |         | Multiple logistic regression |            |         |
|--------------------------------------|------|-----------|------------------------------------|---------|------------------------------|------------|---------|
|                                      |      |           | Prevalence of obesity (%)          | P value | Odds ratio*                  | 95% CI     | P value |
| 0-1                                  | 441  | 23.6± 3.5 | 30.2                               | 0.14    | 1.17                         | 0.94- 1.71 | 0.15    |
| 2-4                                  | 454  | 23.3± 3.2 | 26.2                               |         | 0.92                         | 0.74- 1.15 | 0.49    |
| 5-7                                  | 286  | 23.3± 3.0 | 25.9                               |         | 0.93                         | 0.70- 1.22 | 0.6     |
| 8-10                                 | 231  | 23.2± 3.0 | 26                                 |         | 0.91                         | 0.66- 1.22 | 0.53    |
| 10 <                                 | 1179 | 23.4± 2.9 | 25.9                               |         | 0.96                         | 0.82- 1.11 | 0.57    |

**Women**

| Duration of smoking cessation (year) | n   | BMI       | Cochran-Mantel-Haenszel trend test |         | Multiple logistic regression |            |         |
|--------------------------------------|-----|-----------|------------------------------------|---------|------------------------------|------------|---------|
|                                      |     |           | Prevalence of obesity (%)          | P value | Odds ratio*                  | 95% CI     | P value |
| 0-1                                  | 122 | 21.5± 3.2 | 13.1                               | 0.8     | 1.03                         | 0.58- 1.71 | 0.92    |
| 2-4                                  | 137 | 21.8± 3.5 | 13.9                               |         | 1.03                         | 0.61- 1.66 | 0.91    |
| 5-7                                  | 106 | 22.5± 3.4 | 20.8                               |         | 1.57                         | 0.95- 2.50 | 0.08    |
| 8-10                                 | 60  | 22.0± 3.7 | 16.7                               |         | 1.09                         | 0.51- 2.08 | 0.81    |
| 10 <                                 | 188 | 22.2± 3.2 | 20.2                               |         | 1.18                         | 0.81- 1.68 | 0.37    |

\*Prevalence of obesity of never smokers was used as the reference value.

BMI, body mass index
